# Supplementary material for: Large-scale tropospheric transport in the Chemistry–Climate Model Initiative (CCMI) simulations
Source: Copernicus journal article supplement (doi:10.5194/acp-18-7217-2018), 2018-05-25

Supplement of Atmos. Chem. Phys., 18, 7217–7235, 2018  
<https://doi.org/10.5194/acp-18-7217-2018-supplement>  
© Author(s) 2018. This work is distributed under  
the Creative Commons Attribution 4.0 License.

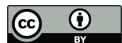

*Supplement of*

## **Large-scale tropospheric transport in the Chemistry–Climate Model Initiative (CCMI) simulations**

**Clara Orbe et al.**

*Correspondence to:* Clara Orbe ([clara.orbe@nasa.gov](mailto:clara.orbe@nasa.gov))

The copyright of individual parts of the supplement might differ from the CC BY 4.0 License.

# S1

## Stratospheric Loss Tracer $\overline{\chi}_{STE}^{DJF}$

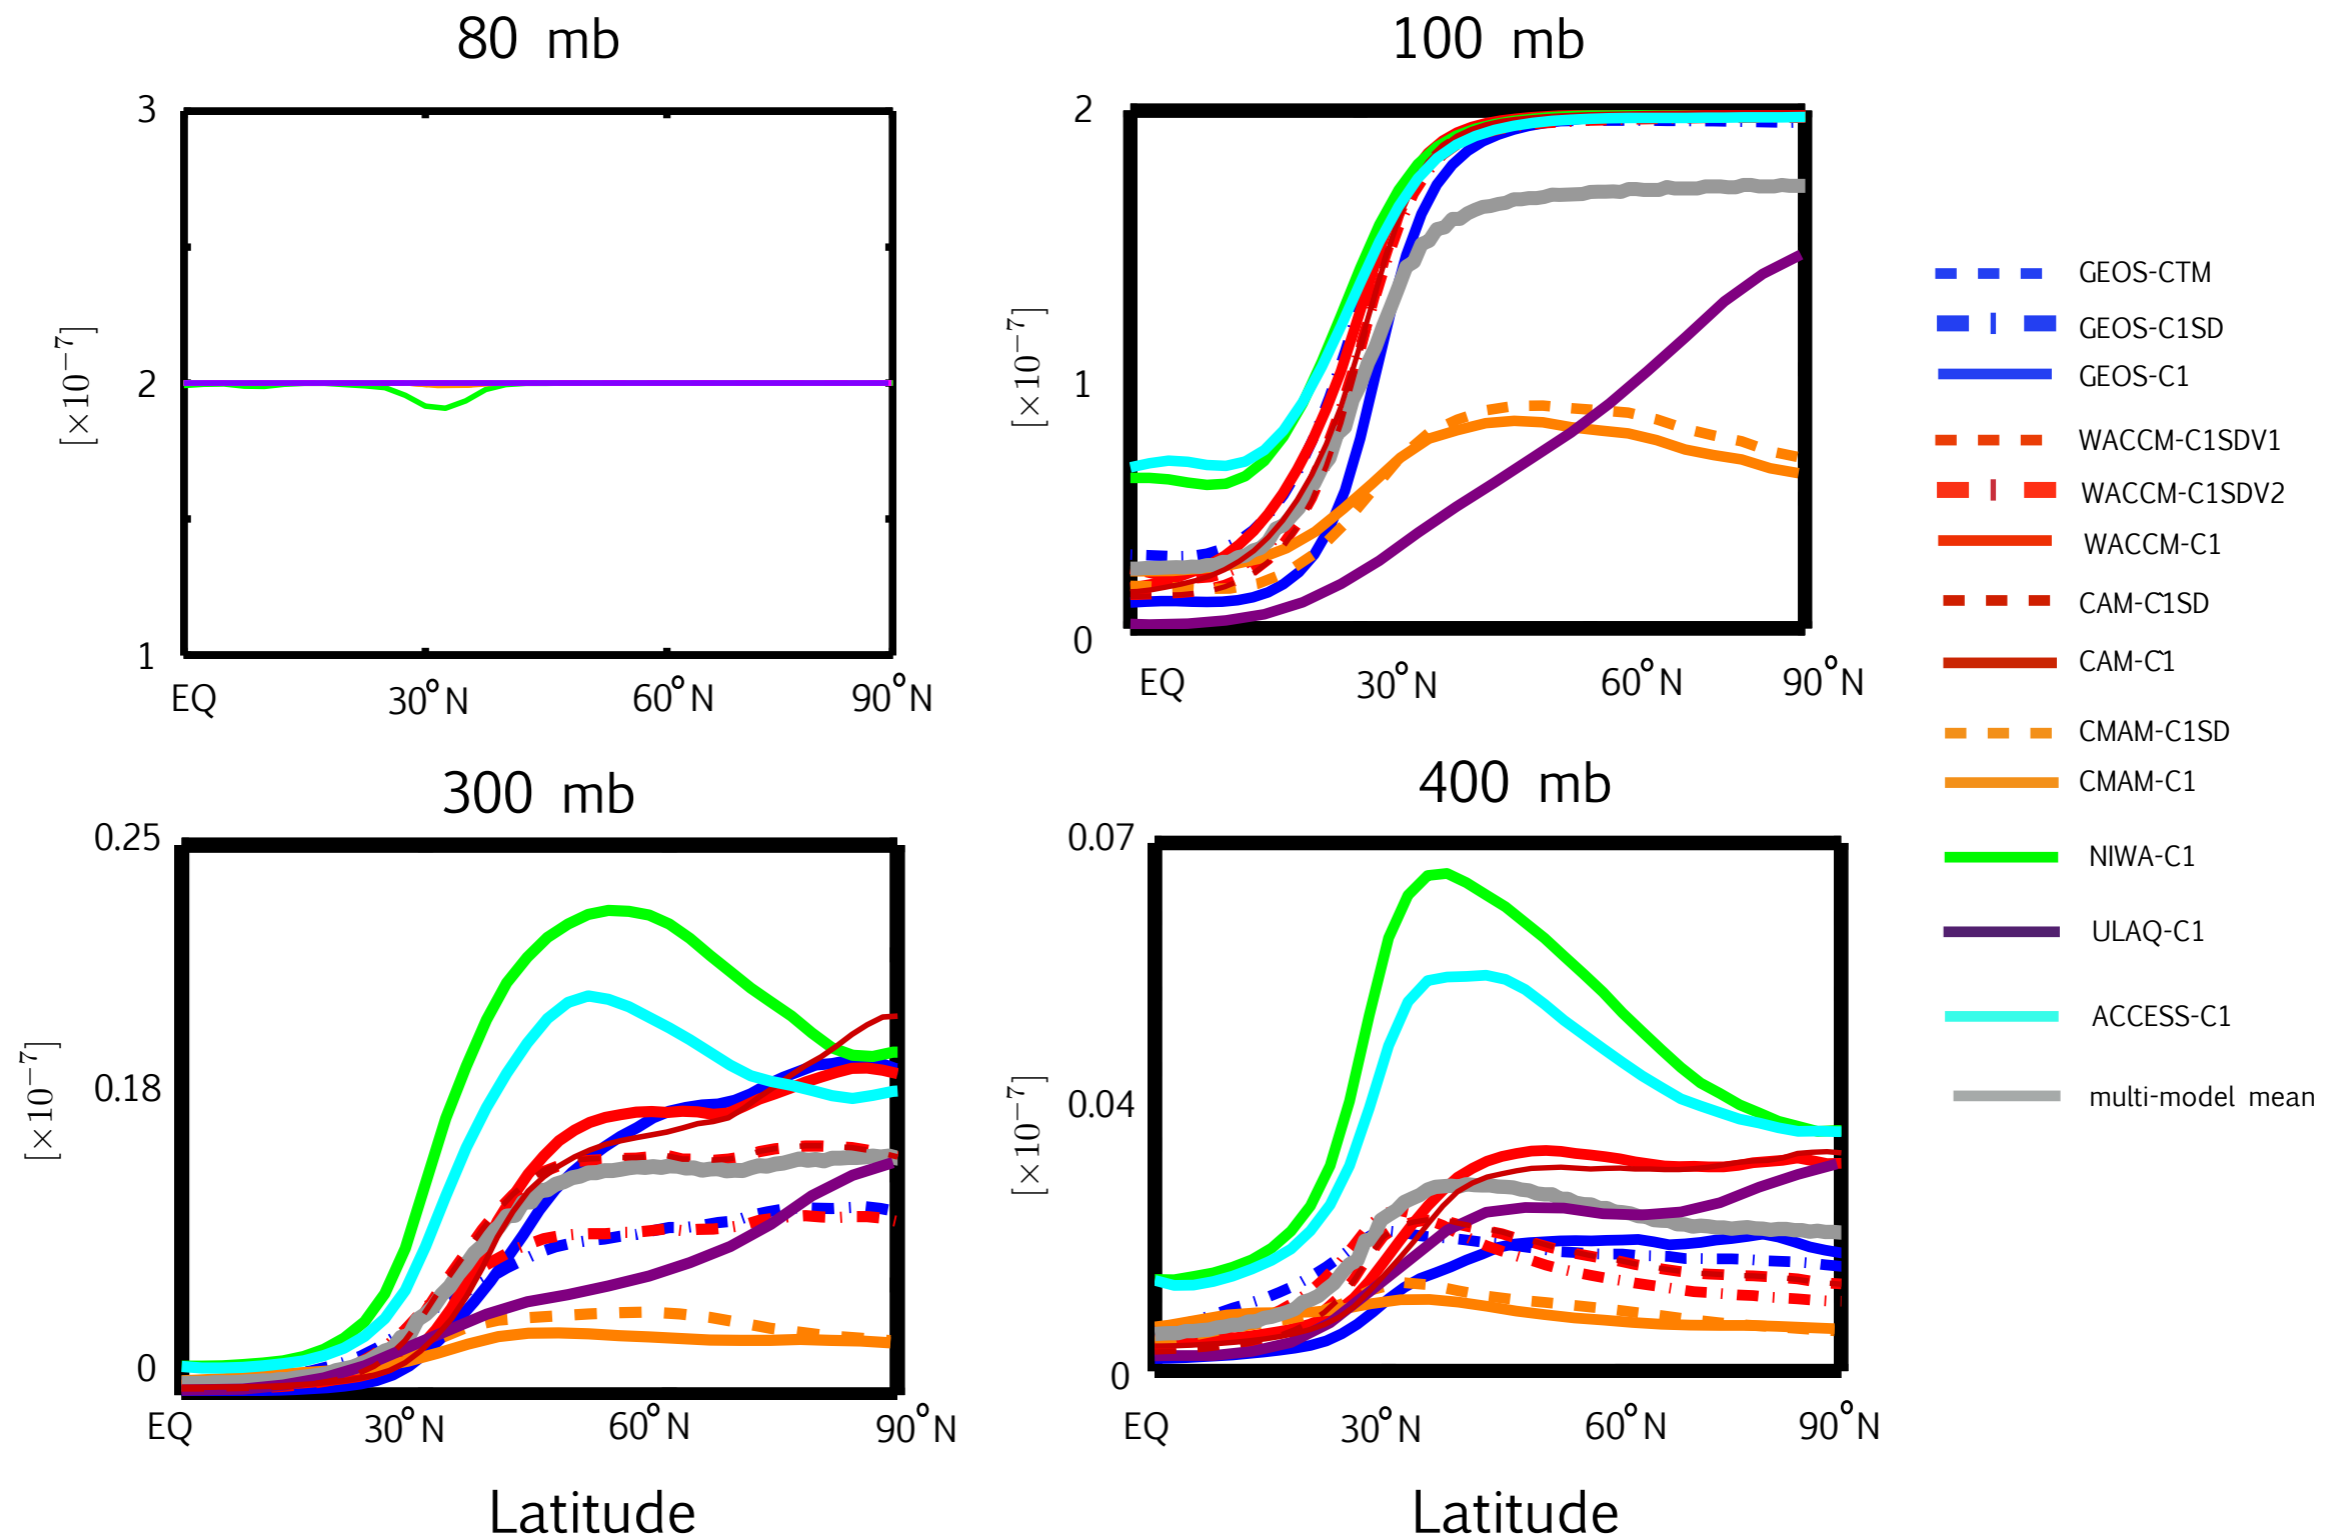

# S2

## DJF Climatological Mean Stratospheric Source Loss Tracer $\overline{\chi}_{STE}^{DJF}$

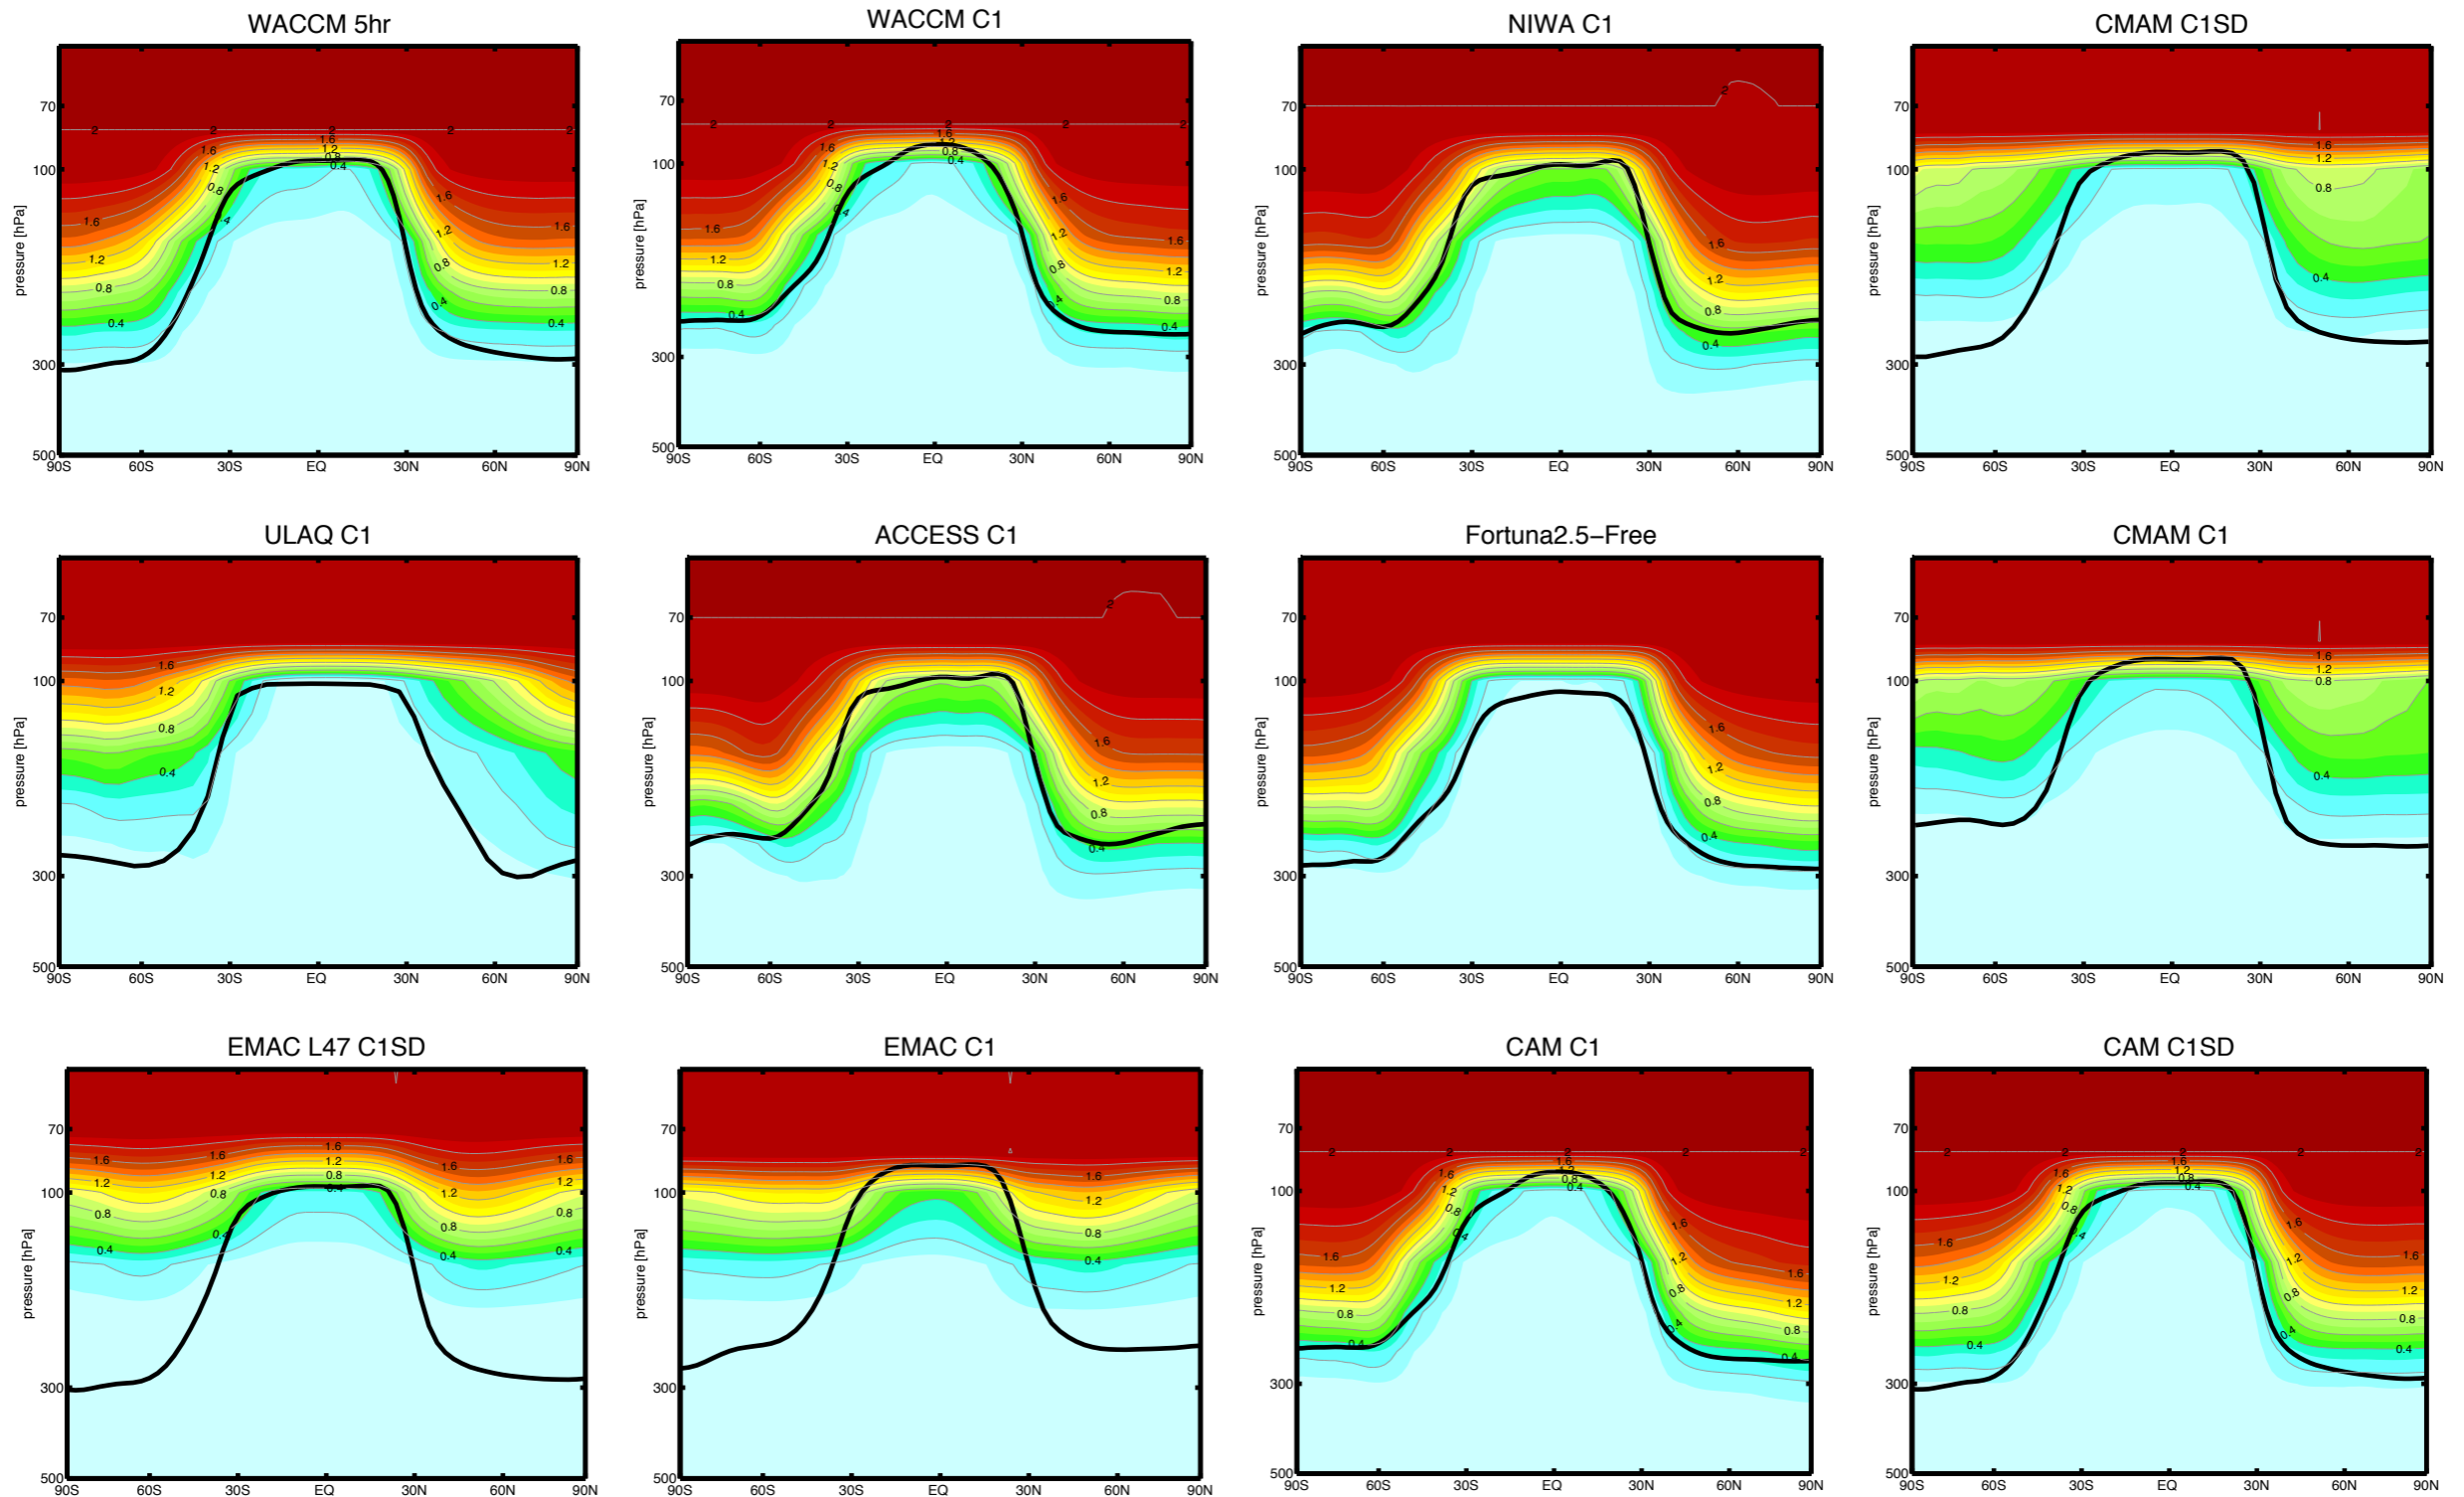

thick black line: thermal tropopause

color contours: units of 100 ppb

# S3

## DJF (Top) and JJA (Bottom) Pressure Velocity ( $\omega$ ) Profiles over NH Midlatitudes

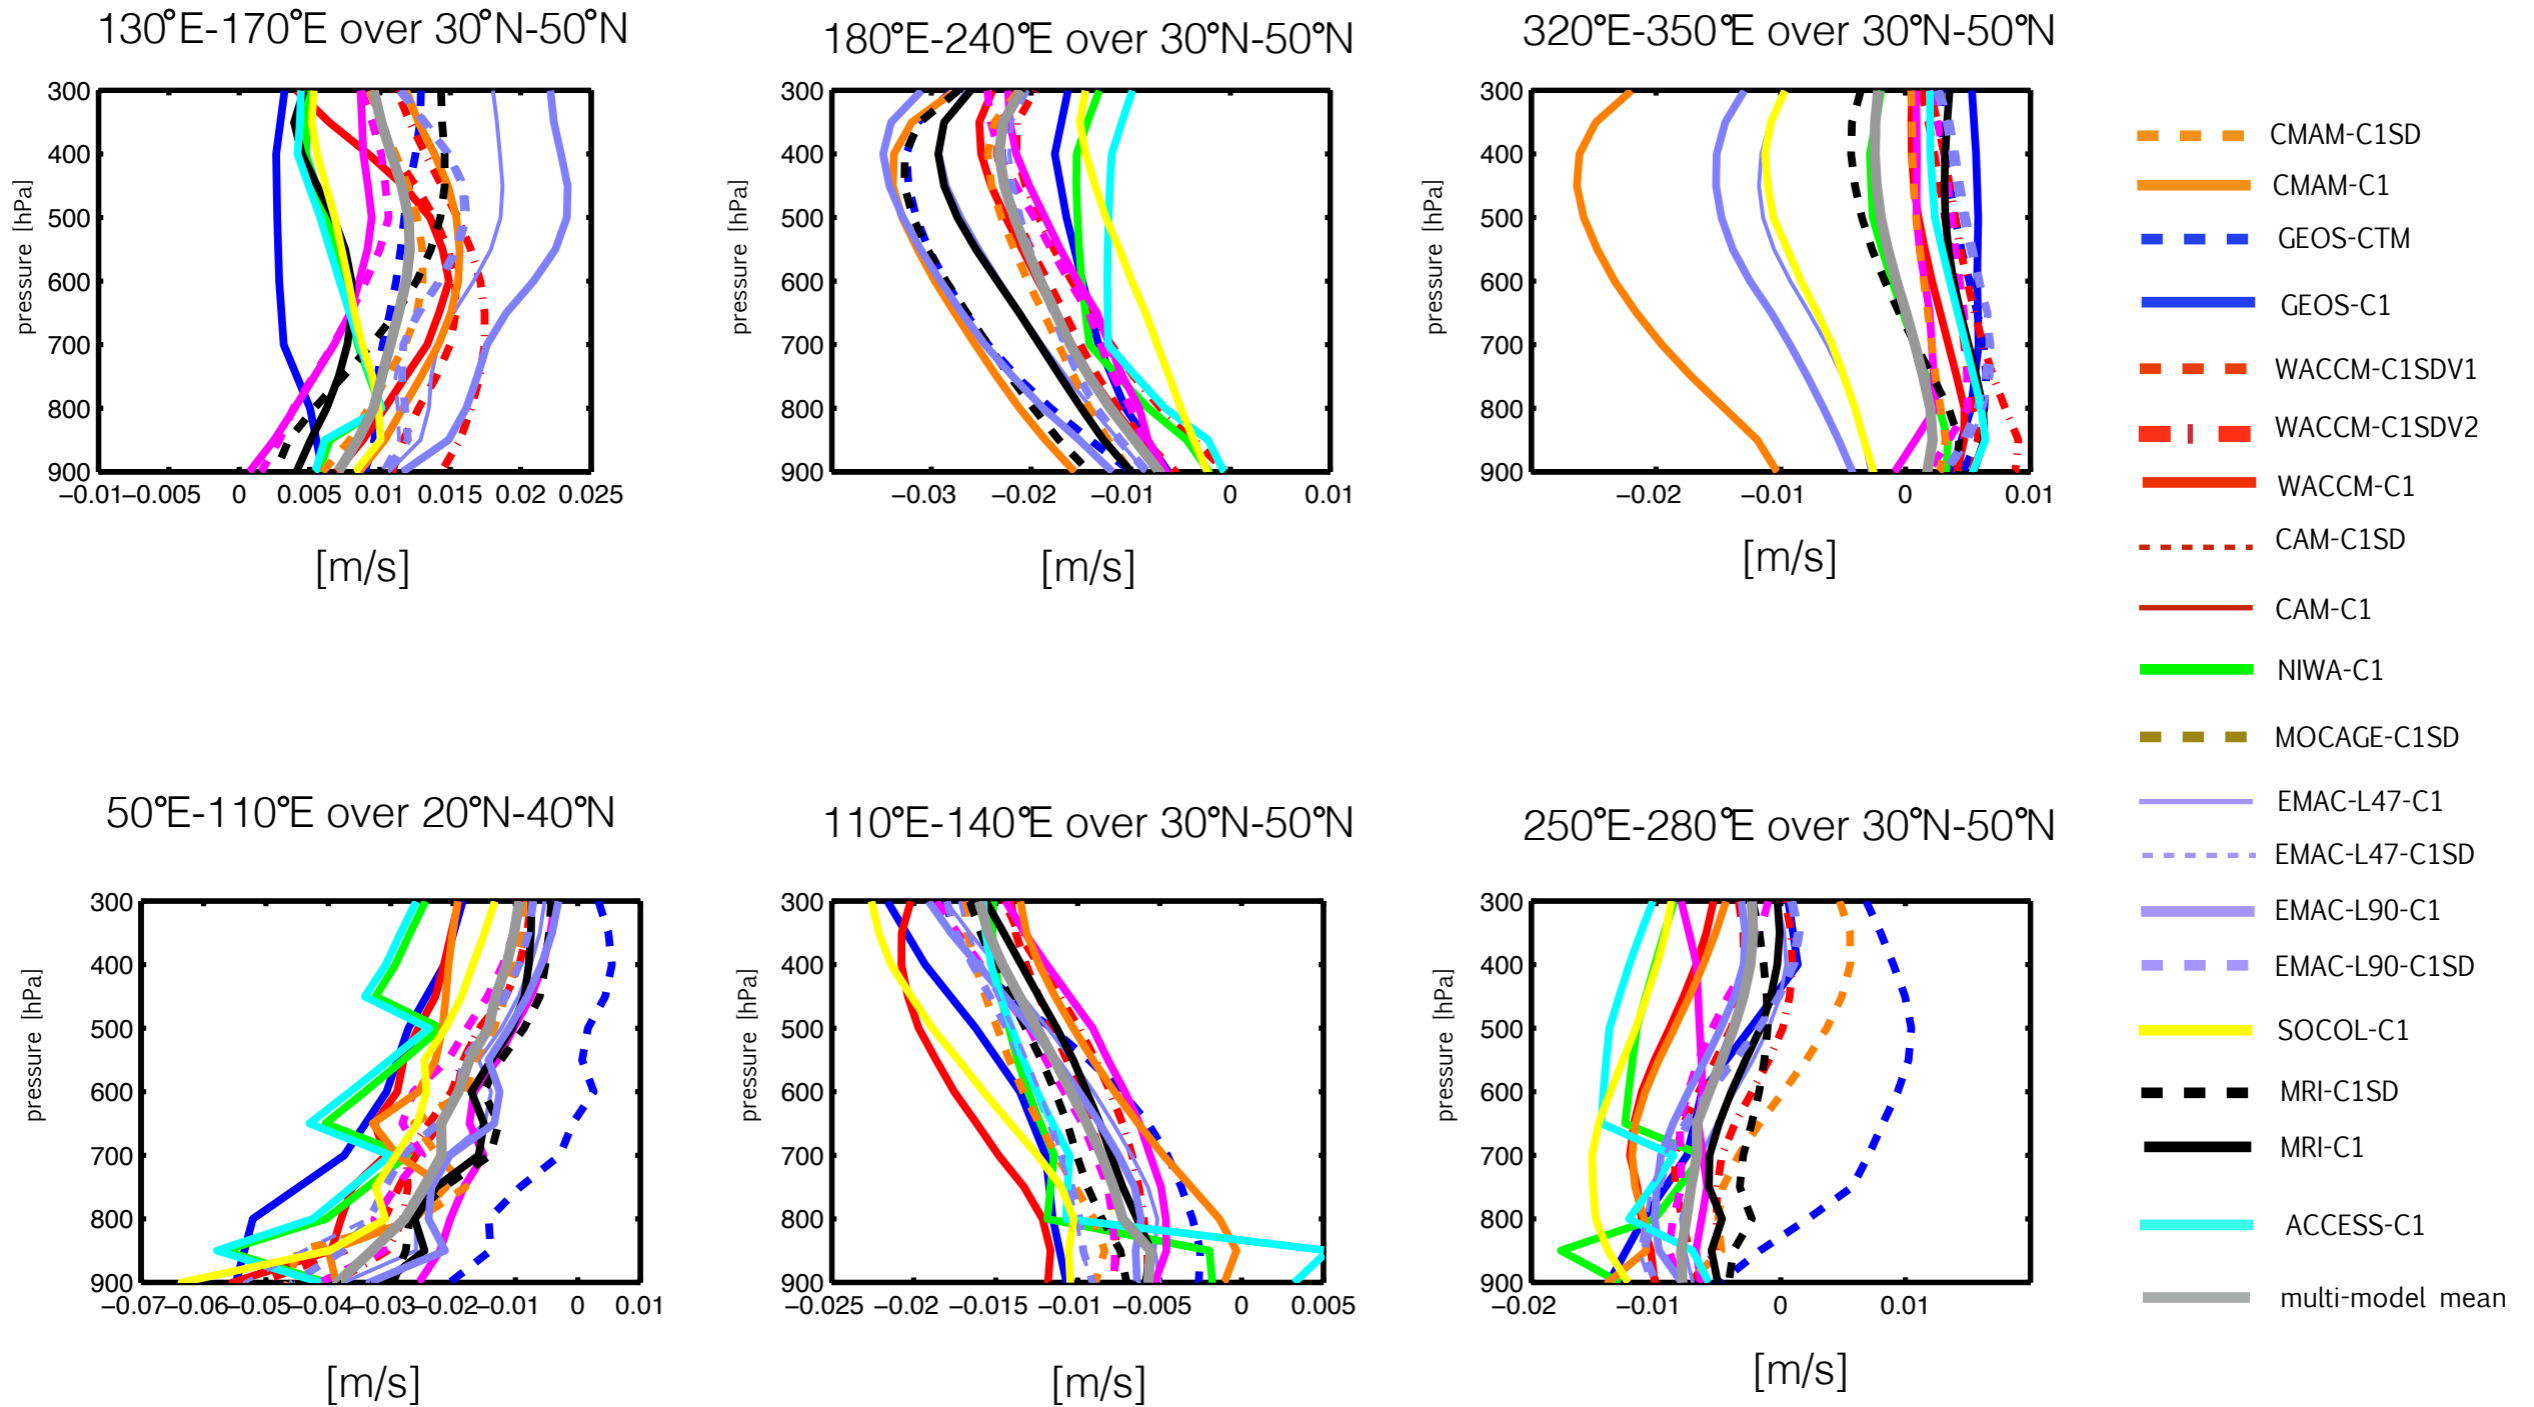

Supplement: Supplementary file 1 [file acp-18-7217-2018-supplement.pdf]
